# Supplementary material
Source: ML conference proceedings conference paper supplement (https://proceedings.mlr.press/v231/xu24a.html)
Supplement: Supplementary file 1 [file xu24a-supp.zip]

---

# Supplementary Materials

---

Anonymous Author(s)

Affiliation

Address

email

## A Proof of Theorem 2, Proposition 3 and Corollary 4

### A.1 Proof of Theorem 2

We first restate Theorem 2 here.

**Theorem 2.** Given two graphs  $G = (\mathcal{V}_G, \mathcal{E}_G), H = (\mathcal{V}_H, \mathcal{E}_H)$ , and let  $\mathbf{u} = (u_1, \dots, u_k) \in \mathcal{V}_G^k, \mathbf{v} = (v_1, \dots, v_k) \in \mathcal{V}_H^k$  where  $k$  is a fixed value to be the target tuples we want to learn from  $G$  and  $H$  respectively. Then, the following statements are equivalent for any  $i, j$  satisfying  $i \geq 0, j > 0, i + j = k$ :

- A  $i$ - $j$ -NL<sub>E</sub> model gives  $\mathbf{u}$  and  $\mathbf{v}$  the same representation.
- $(\mathbf{u}, G) \simeq (\mathbf{v}, H)$ .

*Proof.* To prove the theorem, we need to first use the following fact about higher-order GNNs:

**Lemma A.1.** A  $k$ -GNN with most expressive GNNs distinguishes any non-isomorphic  $k$ -tuples, and assigns isomorphic  $k$ -tuples with the same representation.

With Lemma A.1 we are now able to prove Theorem 2.

1  $\rightarrow$  2: Suppose a  $i$ - $j$ -NL<sub>E</sub> gives  $\mathbf{u}$  and  $\mathbf{v}$  the same representation. From Lemma A.1 it is obvious that we have

$$(\mathbf{u}_{(i+1):}, G_{(\mathbf{u}_{:i})}) \simeq (\mathbf{v}_{(i+1):}, H_{(\mathbf{v}_{:j})}).$$

From the definition of node labeling, we know that there exists an isomorphism  $\pi$  from  $G$  to  $H$  satisfying

$$\pi(u_i) = v_i \text{ for all } i \in \{i+1, \dots, k\}, L(w \mid \mathbf{u}_{:i}, G) = L(\pi(w) \mid \mathbf{v}_{:i}, H) \text{ for all } w \in \mathcal{V}_G.$$

Since  $L(\pi(w) \mid \mathbf{v}_{:i}, H)$  for all  $w \in \mathcal{V}_G \Rightarrow \pi(\mathbf{u}_{:i}) = \mathbf{v}_{:i}$ , we have

$$\begin{aligned} & (\mathbf{u}_{(i+1):}, G_{(\mathbf{u}_{:i})}) \simeq (\mathbf{v}_{(i+1):}, H_{(\mathbf{v}_{:j})}) \\ \Rightarrow & \exists \text{ an isomorphism } \pi : \mathcal{V}_G \rightarrow \mathcal{V}_H, \pi(\mathbf{u}_{:i}) = (\mathbf{v}_{:i}), \pi(\mathbf{u}_{(i+1):}) = (\mathbf{v}_{(i+1):}) \\ \Rightarrow & \exists \text{ an isomorphism } \pi : \mathcal{V}_G \rightarrow \mathcal{V}_H, \pi(\mathbf{u}) = (\mathbf{v}) \\ \Rightarrow & (\mathbf{u}, G) \simeq (\mathbf{v}, H). \end{aligned}$$

2  $\rightarrow$  1: With Lemma A.1 we can deduce

$$\begin{aligned} & (\mathbf{u}, G) \simeq (\mathbf{v}, H) \\ \Rightarrow & \exists \text{ an isomorphism } \pi : \mathcal{V}_G \rightarrow \mathcal{V}_H, \pi(\mathbf{u}_{:i}) = \mathbf{v}_{:i} \\ \Rightarrow & \forall w \in \mathcal{V}_G, L(w \mid \mathbf{u}_{:i}, G) = L(w \mid \mathbf{v}_{:i}, H) \\ \Rightarrow & (\mathbf{u}_{(i+1):}, G_{(\mathbf{u}_{:i})}) \simeq (\mathbf{v}_{(i+1):}, H_{(\mathbf{v}_{:j})}) \\ \Rightarrow & i\text{-}j\text{-NL}_E \text{ gives } \mathbf{u} \text{ and } \mathbf{v} \text{ the same representation.} \end{aligned}$$

Since the above equations hold for all  $i \geq 0, j > 0, i + j = k$ , Theorem 2 is proved.  $\square$

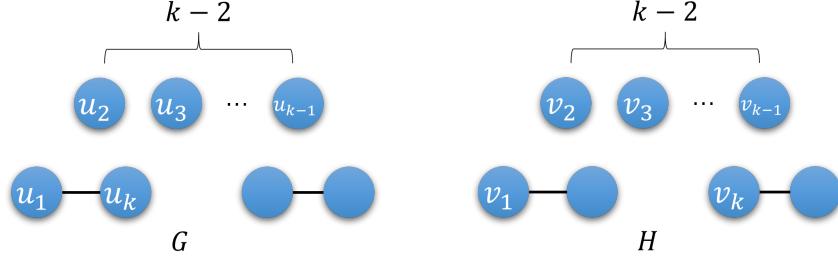

Figure 1: Example of non-isomorphic tuples.

## 21 A.2 Proof of Proposition 3

22 We first restate Proposition 3 here.

23 **Proposition 3.** Suppose  $i, p \geq 0, j, q > 0$  are integers. A  $p$ - $q$ -NL<sub>E</sub> can distinguish any non-  
 24 isomorphic node tuples that a  $i$ - $j$ -NL<sub>E</sub> can distinguish, if and only if  $p + q \geq i + j$ .

25 *Proof.* The proof is straightforward. Since the discriminative power of  $i$ - $j$ -NL<sub>E</sub> is strictly captured  
 26 by the  $(i + j)$ -order isomorphism, the proof is also built on this fact.

27  $2 \rightarrow 1$ : We first prove that  $p + q \geq i + j \Rightarrow p$ - $q$ -NL<sub>E</sub> distinguishes any non-isomorphic node tuples  
 28 that a  $i$ - $j$ -NL<sub>E</sub> distinguishes. Given  $G = (\mathcal{V}_G, \mathcal{E}_G), H = (\mathcal{V}_H, \mathcal{E}_H)$  and  $\mathbf{u} = (u_1, \dots, u_k) \in \mathcal{V}_G^k, \mathbf{v} =$   
 29  $(v_1, \dots, v_k) \in \mathcal{V}_H^k$ , we first prove the situation where  $p + q = i + j + 1$ .

- 30 • if  $k = i + j$ : Suppose  $\mathbf{u}$  and  $\mathbf{v}$  get different representations by  $i$ - $j$ -NL<sub>E</sub>. By pooling the  
 31 representations,  $p$ - $q$ -NL<sub>E</sub> computes the representation of  $\mathbf{u}$  as  $\{\{\mathbf{h}_{(u_1, \dots, u_k, w)} \mid w \in \mathcal{V}\}\}_G$ .  
 32 Then,

$$\begin{aligned}
 & \mathbf{u} \text{ and } \mathbf{v} \text{ get different representations by } i\text{-}j\text{-NL}_E \\
 \Rightarrow & (\mathbf{u}, G) \not\cong (\mathbf{v}, H) \\
 \Rightarrow & \forall w_1 \in \mathcal{V}_G, w_2 \in \mathcal{V}_H, ((u_1, \dots, u_k, w_1), G \not\cong (v_1, \dots, v_k, w_2)) \\
 \Rightarrow & \forall w_1 \in \mathcal{V}_G, w_2 \in \mathcal{V}_H, \mathbf{h}_{(u_1, \dots, u_k, w_1)} \neq \mathbf{h}_{(v_1, \dots, v_k, w_2)} \\
 \Rightarrow & \{\{\mathbf{h}_{(u_1, \dots, u_k, w)} \mid w \in \mathcal{V}_G\}\} \neq \{\{\mathbf{h}_{(v_1, \dots, v_k, w)} \mid w \in \mathcal{V}_H\}\} \\
 \Rightarrow & p\text{-}q\text{-NL}_E \text{ distinguishes } \mathbf{u}, \mathbf{v}.
 \end{aligned}$$

- 33 • if  $k \neq i + j$ : From the above deduction we can see that for any pair of  $(i + j)$ -tuples, if  
 34  $i$ - $j$ -NL<sub>E</sub> assigns different representations for them, then so does  $p$ - $q$ -NL<sub>E</sub>. Obviously, this  
 35 leads to the fact that  $p$ - $q$ -NL<sub>E</sub> is always more expressive than  $i$ - $j$ -NL<sub>E</sub>.

36 Note that when  $p + q = i + j$  the result naturally holds. Then by proof by induction we have proved  
 37 all situations for  $p + q \geq i + j$ .

38  $\neg 2 \rightarrow \neg 1$ : Similar as before, we first assume  $p + q = i + j - 1$ . We build graphs  $G = (\mathcal{V}_G, \mathcal{E}_G), H =$   
 39  $(\mathcal{V}_H, \mathcal{E}_H)$  and  $\mathbf{u} \in \mathcal{V}_G^k, \mathbf{v} \in \mathcal{V}_H^k$  such that  $i$ - $j$ -NL<sub>E</sub> assigns different representations for  $\mathbf{u}, \mathbf{v}$ .  $p$ -  
 40  $q$ -NL<sub>E</sub> also computes the representation of  $\mathbf{u}$  by aggregation as  $(\mathbf{h}_{(u_1, \dots, u_{k-1})}, \mathbf{h}_{(u_2, \dots, u_k)})$ . The  
 41 graphs are constructed as in Figure 1. It is easy to see that  $((u_1, \dots, u_{k-1}), G) \cong ((v_1, \dots, v_{k-1}), H)$   
 42 and  $((u_2, \dots, u_k), G) \cong ((v_2, \dots, v_k), H)$  but clearly  $(\mathbf{u}, G)$  and  $(\mathbf{v}, H)$  are not isomorphic.

43 With proof by induction, the direction  $\neg 2 \rightarrow \neg 1$  is proved. □

## 44 A.3 Proof of Corollary 4

45 We first restate Corollary 4 here.

46 **Corollary 4.** Given the conditions in Theorem 2 hold. Then, we have

$$G_{(\mathbf{u})} \simeq H_{(\mathbf{v})} \iff (\mathbf{u}, G) \simeq (\mathbf{v}, H),$$

47 where  $G_{(\mathbf{u})}, H_{(\mathbf{v})}$  are node labeling induced graphs by labeling  $\mathbf{u}$  and  $\mathbf{v}$  respectively.

48 *Proof.* Corollary 4 is a special situation of the proof step  $1 \rightarrow 2$  in the proof of Theorem 2.

$$\begin{aligned} & G_{(\mathbf{u})} \simeq H_{(\mathbf{v})} \\ \iff & \exists \text{ isomorphism } \pi, \forall w \in \mathcal{V}_G : L(w \mid \mathbf{u}, G) = L(\pi(w) \mid \mathbf{v}, H) \\ \iff & \exists \text{ isomorphism } \pi(\mathbf{u}) = \mathbf{v} \\ \iff & (\mathbf{u}, G) \simeq (\mathbf{v}, H). \end{aligned}$$

49

□

#### 50 A.4 Proof of Lemma A.1

51 *Proof.* Proving Lemma A.1 is equivalent to showing that for any graphs  $G, H$ , the target tuples  $\mathbf{u}, \mathbf{v}$   
52 and  $G^k, H^k$ ,  $(\mathbf{u}, G) \simeq (\mathbf{v}, H) \iff (\mathbf{u}, G^k) \simeq (\mathbf{v}, H^k)$ .

53  $1 \rightarrow 2$ : There exists an isomorphism  $\pi$  from  $G$  to  $H$ , such that  $\pi(\mathbf{u}) = \mathbf{v}$ . We assume a  $k$ -order  
54 permutation  $\pi^k$  which satisfies  $\pi^k(w_1, \dots, w_k) = (\pi(w_1), \dots, \pi(w_k))$ . Then we prove that  $\pi^k$  is a  
55 valid isomorphism from  $G^k$  to  $H^k$ . For all  $\mathbf{w} \in \mathcal{V}_G^k$ , we have

$$\begin{aligned} & \pi^k(\mathcal{N}(\mathbf{w})) \\ = & \{ \{ (\pi^k(i, \dots, w_k), \dots, \pi^k(w_1, \dots, i)) \mid i \in \mathcal{V}_G \} \} \\ = & \{ \{ ((\pi(i), \dots, \pi(w_k)), \dots, (\pi(w_1), \dots, \pi(i))) \mid i \in \mathcal{V}_G \} \} \\ = & \mathcal{N}(\pi(\mathbf{w})). \end{aligned}$$

56 Note that  $\pi$  is structure-preserving: this indicates that for all  $(w_1, \dots, w_k)$ , the label of the cor-  
57 responding  $(\pi(w_1), \dots, \pi(w_k))$  must also be the same. Since we also have  $\pi(\mathbf{u}) = \mathbf{v}$ , we have  
58  $(\mathbf{u}, G^k) \simeq (\mathbf{v}, H^k)$ .

59  $2 \rightarrow 1$ :

$$\begin{aligned} & (\mathbf{u}, G^k) \simeq (\mathbf{v}, H^k) \\ \implies & \exists \pi^k : \mathcal{V}_G^k \rightarrow \mathcal{V}_H^k, \forall \mathbf{w} \in \mathcal{V}_G^k : \pi^k(\mathbf{u}) = \mathbf{v}, \pi^k(\mathcal{N}(\mathbf{w})) = \mathcal{N}(\pi^k(\mathbf{w})). \end{aligned}$$

60 From  $\pi^k(\mathcal{N}(\mathbf{w})) = \mathcal{N}(\pi^k(\mathbf{w}))$  we can further deduce

$$\begin{aligned} & \pi^k(\mathcal{N}(\mathbf{w})) = \mathcal{N}(\pi^k(\mathbf{w})) \\ \implies & \{ \{ (\pi^k(i, \dots, w_k), \dots, \pi^k(w_1, \dots, i)) \mid i \in \mathcal{V}_G \} \} = \\ & \{ \{ ((j, \pi^k(\mathbf{w})_2, \dots, \pi^k(\mathbf{w})_k), \dots, (\pi^k(\mathbf{w})_1, \dots, j)) \mid j \in \mathcal{V}_H \} \}. \end{aligned}$$

61 Now we show that  $\pi^k$  must can be expressed by another  $\pi : \mathcal{V}_G \rightarrow \mathcal{V}_H$  such that  
62  $\pi^k(w_1, \dots, w_k) = (\pi(w_1), \dots, \pi(w_k))$ . First from the above equation we can directly  
63 observe that  $\pi^k(w_1, \dots, w_{k-1}, i)_{:k-1} = \pi^k(w_1, \dots, w_{k-1}, w_k)_{:k-1}$  for all  $w_1, \dots, w_k, i \in$   
64  $\mathcal{V}_G$ . This directly indicates that we can break  $\pi^k$  into two parts:  $\pi^k(w_1, \dots, w_k) =$   
65  $(\pi^{k-1}(w_1, \dots, w_{k-1}), \pi_k(w_k))$  where  $\pi_k : \mathcal{V}_G \rightarrow \mathcal{V}_H$ . The same way, by substituting the re-  
66 sult into  $\pi^k(w_1, \dots, i, w_k)_{:k-2} = \pi^k(w_1, \dots, w_{k-1}, w_k)_{:k-2}$  and continuing we can finally obtain  
67  $\pi^k(w_1, \dots, w_k) = (\pi_1(w_1), \dots, \pi_k(w_k))$ . Next, we need to show that  $\pi_1, \dots, \pi_k$  are all equivalent. By  
68 substituting into  $\pi^k(\mathcal{N}(\mathbf{w})) = \mathcal{N}(\pi^k(\mathbf{w}))$  we have

$$\begin{aligned} & \{ \{ (\pi^k(i, \dots, w_k), \dots, \pi^k(w_1, \dots, i)) \mid i \in \mathcal{V}_G \} \} = \\ & \{ \{ ((j, \pi^k(\mathbf{w})_2, \dots, \pi^k(\mathbf{w})_k), \dots, (\pi^k(\mathbf{w})_1, \dots, j)) \mid j \in \mathcal{V}_H \} \} \\ \implies & \{ \{ ((\pi_1(i), \dots, \pi_k(w_k)), \dots, (\pi_1(w_1), \dots, \pi_k(i))) \mid i \in \mathcal{V}_G \} \} = \\ & \{ \{ ((j, \dots, \pi_k(w_k)), \dots, (\pi_1(w_1), \dots, j)) \mid j \in \mathcal{V}_H \} \}. \end{aligned}$$

69 Therefore, for all  $i \in \mathcal{V}_G$ , there must exists a corresponding  $j \in \mathcal{V}_H$  such that  $\pi_1(i) = \pi_2(i) =$   
70  $\dots = \pi_k(i) = j$ . As a result, we proved that there exists  $\pi : \mathcal{V}_G \rightarrow \mathcal{V}_H$  such that  $\pi^k(w_1, \dots, w_k) =$

71  $(\pi(w_1), \dots, \pi(w_k))$ . Next we need to show that  $\pi$  is an isomorphism from  $G$  to  $H$ . This is easily done  
 72 by noticing that for all  $w_1, \dots, w_k \in \mathcal{V}_G$ , the structures between  $w_1, \dots, w_k$  and  $\pi(w_1), \dots, \pi(w_k)$  must  
 73 be the same, otherwise  $(w_1, \dots, w_k)$  and  $(\pi(w_1), \dots, \pi(w_k))$  would have different labels. Therefore,  
 74 for any  $w_1, w_2$  we have  $(w_1, w_2) \in \mathcal{E}_G \iff (\pi(w_1), \pi(w_2)) \in \mathcal{E}_H$ , and  $\pi$  is an isomorphism from  
 75  $G$  to  $H$ . Together, we have  $(\mathbf{u}, G) \simeq (\mathbf{v}, H)$ .  $\square$

## 76 B Proof of Theorem 5 and Proposition 6, 7, 8

### 77 B.1 Proof of Theorem 5

78 We first restate Theorem 5 here.

79 **Theorem 5.** *Given two graphs  $G = (\mathcal{V}_G, \mathcal{E}_G), H = (\mathcal{V}_H, \mathcal{E}_H)$ , and let  $\mathbf{u} = (u_1, \dots, u_k) \in$   
 80  $\mathcal{V}_G^k, \mathbf{v} = (v_1, \dots, v_k) \in \mathcal{V}_H^k$  where  $k$  is a fixed value to be the target tuples we want to learn from  $G$   
 81 and  $H$  respectively. Then, for any  $i, j$  satisfying  $i > 0, j > 0, i + j = k$ , the expressive power of  
 82  $(i - 1) - (j + 1) - \text{NL}_{\text{MP}}$  is strictly higher than  $i - j - \text{NL}_{\text{MP}}$ , that is:*

- 83 • *There is a  $i - j - \text{NL}_{\text{MP}}$  that distinguishes  $\mathbf{u}$  and  $\mathbf{v} \implies$  There is a  $(i - 1) - (j + 1) - \text{NL}_{\text{MP}}$  that*  
 84 *distinguishes  $\mathbf{u}$  and  $\mathbf{v}$ .*
- 85 • *There exists  $G, H, \mathbf{u}, \mathbf{v}$  such that a  $(i - 1) - (j + 1) - \text{NL}_{\text{MP}}$  distinguishes  $\mathbf{u}$  and  $\mathbf{v}$  but  $i - j -$*   
 86  *$\text{NL}_{\text{MP}}$  cannot.*

87 *Proof.* We prove the two results separately. To prove the first result, we first recall the procedure of  
 88  $0 - k - \text{NL}_{\text{MP}}$  (or  $k - \text{FWL}$ ). Given  $G = (\mathcal{V}, \mathcal{E})$ , at each layer it evaluates

$$\text{Col}^{(l+1)}(u_1, \dots, u_k) = \text{Hash}\left(\text{Col}^{(l)}(u_1, \dots, u_k), \left\{ \left( \text{Col}^{(l)}(v, u_2, \dots, u_k), \text{Col}^{(l)}(u_1, v, \dots, u_k), \dots, \text{Col}^{(l)}(u_1, \dots, u_{k-1}, v) \right) \mid v \in \mathcal{V} \right\} \right).$$

89 If we consider a fragment of the above procedure where we replace the first  $i$  colors in each neighbor  
 90 with the initial colors

$$\begin{aligned} \text{Col}^{(l+1)}(u_1, \dots, u_k) = & \text{Hash}\left(\text{Col}^{(l)}(u_1, \dots, u_k), \right. \\ & \left\{ \left\{ \left( \text{Col}^{(0)}(v, u_2, \dots, u_k), \dots, \text{Col}^{(0)}(u_1, \dots, u_{i-1}, v, u_{i+1}, \dots, u_k), \right. \right. \right. \\ & \left. \left. \left. \text{Col}^{(l)}(u_1, \dots, u_i, v, u_{i+2}, \dots, u_k), \dots, \text{Col}^{(l)}(u_1, \dots, u_{k-1}, v) \right) \mid v \in \mathcal{V}_G \right\} \right\} \right). \end{aligned}$$

91 Clearly, this variant is less expressive than the original one. We can rewrite this variant to make it  
 92 strictly corresponded to  $i - (k - i) - \text{NL}_{\text{MP}}$ . First, note that the first  $i$  variables in  $\text{Col}^{(l)}$  and  $\text{Col}^{(l+1)}$   
 93 are the same. This inspires that we can rewrite the equations when we fix the first  $i$  variables  $u_1, \dots, u_i$   
 94 as

$$f^{(l+1)}(u_{i+1}, \dots, u_k) = \phi\left(f^{(l)}(u_{i+1}, \dots, u_k), \left\{ \left( f^{(l)}(v, \dots, u_k), \dots, f^{(l)}(u_{i+1}, \dots, v) \right) \mid v \in \mathcal{V} \right\} \right),$$

95 where we initialize  $f^{(0)}$  as  $f^{(0)}(u_{i+1}, \dots, u_k) = \text{Col}^{(0)}(u_1, \dots, u_k)$ . The computation of  $f^{(l)}$  is  
 96 exactly the same as  $i - (k - i) - \text{NL}_{\text{MP}}$  when we apply node labeling on  $u_1, \dots, u_k$ . Since  $i - j - \text{NL}_{\text{MP}}$   
 97 is clearly corresponded to a more “small” fragment of the above equations compared with  $(i - 1) -$   
 98  $(j + 1) - \text{NL}_{\text{MP}}$ , we have proved the first result.

99 To prove the second result, we need to utilize the results from Grohe and Otto [3]. Cai et al. [1]  
 100 designed a construction of a series of pairs of non-isomorphic graph  $\text{CFI}(k)$  such that  $(k - 1) - \text{FWL}$   
 101 fails to distinguish them. Further more, Grohe and Otto [3] proposed a variant of CFI graphs and  
 102 showed that there are graphs such that  $(k - 1) - \text{FWL}$  cannot distinguish them but  $k - \text{FWL}$  can. Our  
 103 proof is based on this result. Suppose  $G, H$  are non-isomorphic graphs than cannot be distinguished  
 104 by  $j - \text{FWL}$  but are distinguished by  $(j + 1) - \text{FWL}$ . We first obtain the following property of FWL

105 **Lemma B.1.** *If two graphs  $G_1 = (\mathcal{V}_{G_1}, \mathcal{E}_{G_1}), H_1 = (\mathcal{V}_{H_1}, \mathcal{E}_{H_1})$  are not distinguished by  $k - \text{FWL}$ ,  
 106  $G_2 = (\mathcal{V}_{G_2}, \mathcal{E}_{G_2}), H_2 = (\mathcal{V}_{H_2}, \mathcal{E}_{H_2})$  are also not distinguished by  $k - \text{FWL}$ , then we let  $G = (\mathcal{V}_G, \mathcal{E}_G)$   
 107 where  $\mathcal{V}_G = \mathcal{V}_{G_1} \cup \mathcal{V}_{G_2}, \mathcal{E}_G = \mathcal{E}_{G_1} \cup \mathcal{E}_{G_2}$  and  $H = (\mathcal{V}_H, \mathcal{E}_H)$  where  $\mathcal{V}_H = \mathcal{V}_{H_1} \cup \mathcal{V}_{H_2}, \mathcal{E}_H =$   
 108  $\mathcal{E}_{H_1} \cup \mathcal{E}_{H_2}$ .  $G$  and  $H$  are still not distinguished by  $k - \text{FWL}$ .*

109 It is easy to prove Lemma B.1 by induction. Suppose  $\varphi$  is a  $\text{FOC}_{k+1}$  formula. Then,

- 110 • If  $\varphi$  is of the form  $\varphi := C$ , i.e. node colors or edges, then obviously  $\varphi$  produces the same  
111 results on  $G, H$ .
- 112 • If  $\varphi := \varphi' \wedge \varphi''$  and  $\varphi', \varphi''$  produce the same results on  $G, H$ , then obviously  $\varphi$  also  
113 produces the same results on  $G, H$ .
- 114 • if  $\varphi := \neg\varphi'$ , the situation is the same as before.
- 115 • if  $\varphi := \exists^N \varphi'$ , and  $\varphi'$  produces the same results on  $G, H$ . We let  $m, n$  to be the number of  
116 distinct groundings of  $\varphi'$  on  $G_1, G_2$  respectively. Then, the number of distinct groundings  
117 of  $\varphi'$  on  $H_1, H_2$  are also  $m, n$ . (otherwise a formula  $\varphi'' = (\exists^m \varphi') \wedge \neg(\exists^{m+1} \varphi')$  differs on  
118  $G_1, H_1$  or  $\varphi'' = (\exists^n \varphi') \wedge \neg(\exists^{n+1} \varphi')$  differs on  $G_2, H_2$ .) Therefore, on both  $G, H$   $\varphi$  still  
119 produces the same results.

120 Therefore, any  $\text{FOC}_{k+1}$  formula, if produces the same results on  $G_1, H_1$  and  $G_2, H_2$ , also produces  
121 the same results on  $G, H$ . As a result  $k$ -FWL cannot distinguishes  $G, H$ .

122 With Lemma B.1 we can construct counterexamples for  $i$ - $j$ - $\text{NL}_{\text{MP}}$  and  $(i-1)$ -( $j+1$ )- $\text{NL}_{\text{MP}}$ .  
123 Suppose  $G, H$  cannot be distinguished by  $j$ -FWL but are distinguished by  $(j+1)$ -FWL. We add  
124  $k$  isolated nodes  $u_1, \dots, u_k$  to  $G$  and  $v_1, \dots, v_k$  to  $H$ , obtaining  $G', H'$ . Furthermore, the labels of  
125  $u_1, \dots, u_k$  are distinct and different from the rest of the nodes, and we let the label of  $v_l$  to be the same  
126 with  $u_l$  for  $l \in [k]$ . We then apply  $i$ - $j$ - $\text{NL}_{\text{MP}}$  and  $(i-1)$ -( $j+1$ )- $\text{NL}_{\text{MP}}$  to learn the representation of  
127  $\mathbf{u} = (u_1, \dots, u_k) \in \mathcal{V}_G^k$  and  $\mathbf{v} = (v_1, \dots, v_k) \in \mathcal{V}_H^k$ . Apparently from Lemma B.1 we know that  $i$ - $j$ -  
128  $\text{NL}_{\text{MP}}$  cannot distinguish them. Since a  $(j+1)$ -FWL can distinguish  $G$  and  $H$ , it also distinguishes  
129  $G'$  and  $H'$ . This indicates that there is a  $\text{FOC}_{j+1}$  formula  $\varphi$  such that  $G' \models \varphi$  and  $H' \not\models \varphi$ . By letting  
130  $\psi(x_1, \dots, x_j) := \varphi()$  we can see that  $\psi(u_{i+1}, \dots, u_k) \neq \psi(v_{i+1}, \dots, v_k)$ . Therefore, the  $j+1$ -FWL  
131 also assign different colors to  $(u_{i+1}, \dots, u_k)$  and  $(v_{i+1}, \dots, v_k)$ . As a result  $(i-1)$ -( $j+1$ )- $\text{NL}_{\text{MP}}$   
132 distinguishes them.  $\square$

## 133 B.2 Proof of Proposition 6

134 To prove Proposition 6 is to construct a counterexample for  $i$ - $j$ - $\text{NL}_{\text{MP}}$  and  $p$ - $q$ - $\text{NL}_{\text{MP}}$ . Specially,  
135 from the proof of Theorem 5 we know that we only need to construct a counterexample for  $k$ -1- $\text{NL}_{\text{MP}}$   
136 and 0- $k$ - $\text{NL}_{\text{MP}}$  for any  $k$ . We first introduce a series of graph pairs proposed by Grohe and Otto [3].

137 Let  $\mathcal{K} = (\mathcal{V}, \mathcal{E})$  be the complete graph on  $k$  nodes. We further assume the nodes in  $\mathcal{K}$  are  $v_1, \dots, v_k$ .  
138 We define the construction of a structure  $\mathcal{X}(\mathcal{K})$ , which is the *CFI-companions* of  $\mathcal{K}$ , as follows. It is  
139 convenient to call the nodes from  $\mathcal{X}(\mathcal{K})$  *vertices*, to distinguish them from the nodes of  $\mathcal{K}$ .

140 For every  $v \in \mathcal{V}$ , the graph  $\mathcal{X}(\mathcal{K})$  has a vertex  $v^S$ , where  $S$  is a subset of  $\mathcal{E}(v)$  of even cardinality. We  
141 use  $\mathcal{E}(v)$  to denote the edges connected with  $v$ . For every edge  $e \in \mathcal{E}$ , the graph  $\mathcal{X}$  has two vertices  
142  $e^0, e^1$ . Vertices of the form  $v^S$  are called node vertices and vertices  $e^i$  edge vertices. Formally, the  
143 set of vertices in  $\mathcal{X}(\mathcal{K})$  is

$$\{v^S \mid v \in \mathcal{V}, S \subseteq \mathcal{E}(v) \text{ such that } |S| \equiv 0 \pmod{2}\} \cup \{e^0, e^1 \mid e \in \mathcal{E}\}. \quad (1)$$

144 The edges of  $\mathcal{X}(\mathcal{K})$  link node vertices and edge vertices according to

$$(v^S, e_i) \text{ is an edge if } \begin{cases} i = 1 \text{ and } e \in S \\ i = 0 \text{ and } e \notin S \end{cases} \quad (2)$$

145 In  $\mathcal{X}(\mathcal{K})$ , the vertices of the form  $v^S$  are colored  $C_v$ , and the vertices of the form  $e^i$  are colored  
146  $C_e$ . After defining  $\mathcal{X}(\mathcal{K})$ , we also define its variant  $\hat{\mathcal{X}}(\mathcal{K})$  whose node set and edge set are the same  
147 except that for the node  $v_1$  we take nodes  $v_1^S$  from the subsets of  $\mathcal{E}(v_1)$  of odd cardinality. It is proved  
148 by Grohe and Otto [3] that  $\mathcal{X}(\mathcal{K}), \hat{\mathcal{X}}(\mathcal{K})$  are distinguished by  $(k-1)$ -FWL but not  $(k-2)$ -FWL.

149 Before we proceed, we would like to provide a  $k=3$  example to illustrate  $\mathcal{X}(\mathcal{K})$  and  $\hat{\mathcal{X}}(\mathcal{K})$  in Figure  
150 2. The graphs  $\mathcal{X}(\mathcal{K})$  and  $\hat{\mathcal{X}}(\mathcal{K})$  are distinguished by 2-FWL but not 1-WL.

151 Now we proceed to prove Proposition 6. We first restate it here.

**Proposition 6.** Suppose  $i, p \geq 0, j, q > 0$  are integers. There is a  $p$ - $q$ -NL<sub>MP</sub> that distinguishes any non-isomorphic node tuples that a  $i$ - $j$ -NL<sub>MP</sub> can distinguish if and only if  $p + q \geq i + j$  and  $q \geq j$ . Otherwise, there exists non-isomorphic node tuples that a  $p$ - $q$ -NL<sub>MP</sub> cannot distinguish but a  $i$ - $j$ -NL<sub>MP</sub> can distinguish.

*Proof.* We first show that there are graphs distinguished by  $(k-2)$ -1-NL<sub>MP</sub> but not 0- $(k-2)$ -NL<sub>MP</sub>. We construct CFI graphs  $\mathcal{X}(\mathcal{K})$  and  $\hat{\mathcal{X}}(\mathcal{K})$ . From Grohe and Otto [3] we know that  $\mathcal{X}(\mathcal{K})$  and  $\hat{\mathcal{X}}(\mathcal{K})$  cannot be distinguished by 0- $(k-2)$ -NL<sub>MP</sub>, whose expressive power is bounded by  $(k-2)$ -FWL.

Next we show that  $\mathcal{X}(\mathcal{K})$  and  $\hat{\mathcal{X}}(\mathcal{K})$  can be distinguished by a  $(k-2)$ -1-NL<sub>MP</sub>. To do so we need to introduce the concept of *pebble games*[3, 1]. The readers are welcome to check [3] for a more detailed introduction. Given two structures  $\mathcal{A}, \mathcal{B}$ , the *bijective  $k$ -pebble game* is played by two players by placing  $k$  pairs of pebbles on a pair of structures  $\mathcal{A}, \mathcal{B}$ . The rounds of the game are as follows. Player **I** picks up one of his pebbles, and player **II** picks up her corresponding pebble. Then player **II** chooses a bijection  $f$  between  $\mathcal{A}$  and  $\mathcal{B}$  (if no such bijection exists player **II** immediately loses). Then player **I** places his pebble on an element  $a$  of  $\mathcal{A}$ , and player **II** places her pebble on  $f(a)$ . After each round there is a subset  $p \subseteq \mathcal{A} \times \mathcal{B}$  consisting of the at most  $k$  pairs of elements corresponding to the pebbles placed. Player **II** wins a play if every position  $p$  is a local isomorphism.

**Theorem B.2.** (Cai et al. [1])  $\mathcal{A} \equiv_C^k \mathcal{B}$  if and only if player **II** has a winning strategy for the bijective  $k$ -pebble game on  $\mathcal{A}, \mathcal{B}$ .

Theorem B.2 indicates that  $(k-1)$ -FWL can distinguish  $\mathcal{A}, \mathcal{B}$  if and only if player **II** has a winning strategy for the bijective  $k$ -pebble game on  $\mathcal{A}, \mathcal{B}$ . However, although it justifies  $(k-1)$ -FWL, it has nothing to do with the  $(k-2)$ -1-NL<sub>MP</sub> here. We propose a variant of the bijective  $k$ -pebble game, namely restricted bijective  $k$ - $i$ -pebble game, described as follows. Given two structures  $\mathcal{A}, \mathcal{B}$ , the *restricted bijective  $k$ - $i$ -pebble game* is also played by two players by placing  $k$  pairs of pebbles on a pair of structures  $\mathcal{A}, \mathcal{B}$ . The rounds of the game are as follows. Player **I** picks up one of his pebbles, and player **II** picks up her corresponding pebble. Then player **II** chooses a bijection  $f$  between  $\mathcal{A}$  and  $\mathcal{B}$  (if no such bijection exists player **II** immediately loses). Then player **I** places his pebble on an element  $a$  of  $\mathcal{A}$ , and player **II** places her pebble on  $f(a)$ . The difference is,  $i$  pairs of the pebbles are static, as when the players place these pebbles on the elements of  $\mathcal{A}, \mathcal{B}$ , they can no longer pick and replace them on other elements. Then, we have

**Theorem B.3.** There is a  $(k-2)$ -1-NL<sub>MP</sub> that distinguishes the  $(k-2)$ -tuples  $\mathbf{u}, \mathbf{v}$  from  $\mathcal{A}, \mathcal{B}$  if and only if player **II** has a winning strategy for the restricted bijective  $k$ -( $k-2$ )-pebble game on  $\mathcal{A}, \mathcal{B}$  which initially places  $(k-2)$  static pebbles on  $\mathbf{u}, \mathbf{v}$ , if  $\mathcal{A}, \mathcal{B}$  are connected graphs.

Theorem B.3 is proved in the next section. With Theorem B.3 we can now prove that the graphs  $\mathcal{X}(\mathcal{K})$  and  $\hat{\mathcal{X}}(\mathcal{K})$  can be distinguished by  $(k-2)$ -1-NL<sub>MP</sub>. The prove steps are exactly the same as in [3], as the steps in [3] naturally follow the constraints of the bijective  $k$ -( $k-2$ )-pebble game.

We give a winning strategy for player **I** in the bijective  $k$ -( $k-2$ )-pebble game. In the first  $k-1$  rounds of the game, player **I** picks his  $k-1$  pebbles on  $v_2^\emptyset, \dots, v_k^\emptyset$  and suppose  $p(v_i^\emptyset) = v_i^{S_i}$  is the corresponding position for some sets  $S_i$ . That is,

$$p = \{v_2^\emptyset v_2^{S_2}, \dots, v_k^\emptyset v_k^{S_k}\}.$$

We now assume that the pebbles at  $v_3^\emptyset, \dots, v_k^\emptyset$  are static. Therefore  $v_3^\emptyset, \dots, v_k^\emptyset$  compose all  $k-2$  static pebbles and the pebble at  $v_2^\emptyset$  is still movable. In the next round of the game player **I** starts by selecting this pebble, and places it on  $e_{12}^\emptyset$ . In the next round, player **I** starts by selecting the pebble on  $e_{12}^\emptyset$  and places it on  $v_1^\emptyset$ . It is proved by Grohe and Otto [3] that player **I** wins at this time.

□

### B.3 Proof of Proposition 7

We first restate Proposition 7 here.

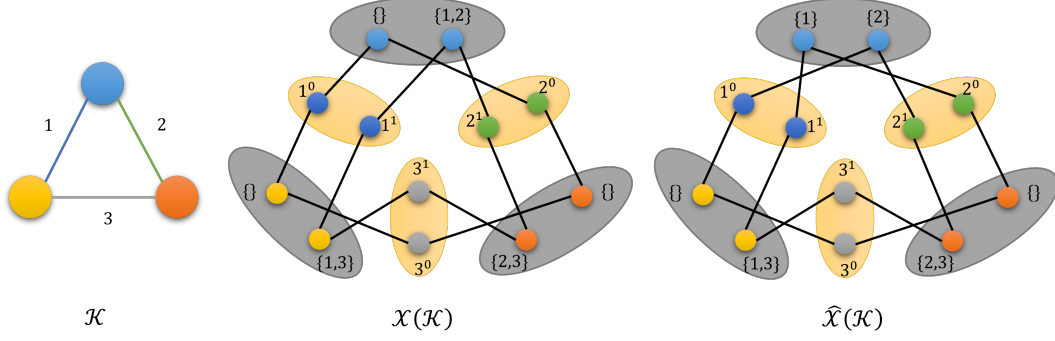

Figure 2: Example of non-isomorphic graphs.

**Proposition 7.** For any  $k$ -tuples  $\mathbf{u}, \mathbf{v}$  and  $i + j = k$ : There is a  $i$ - $j$ -NL<sub>MP</sub> that distinguishes  $\mathbf{u}$  and  $\mathbf{v}$   $\iff$  There is a  $\text{FOC}_{k+1,i}$  formula that distinguishes  $\mathbf{u}$  and  $\mathbf{v}$ .

*Proof.* To prove Proposition 7 we can first use the results from [1].

**Theorem B.4.** (Cai et al. [1]) Let  $G, H$  be a pair of colored graphs and let  $\mathbf{u} \in \mathcal{V}_G^k, \mathbf{v} \in \mathcal{V}_H^k$  be  $k$ -tuples. The following are equivalent:

- $k$ -FWL assigns the same color for  $\mathbf{u}, \mathbf{v}$ .
- All  $\text{FOC}_{k+1}$  produce the same result for  $\mathbf{u}, \mathbf{v}$ .

The above equivalence can be extend to node labeling situations. Formally, given  $G = (\mathcal{V}, \mathcal{E})$  and  $\mathbf{u} = (u_1, \dots, u_k) \in \mathcal{V}^k$ , and let  $i + j = k$ . Then, applying a  $i$ - $j$ -NL<sub>MP</sub> is essentially first assigning additional predicates  $\text{IsTarget}_l(\cdot)$  for  $l \in [i]$ . Further more, we have  $\text{IsTarget}_l(v) = \mathbf{1}_{v=u_l}$ . Then, it applies a  $j$ -MPNN on the augmented graph  $G_{(\mathbf{u},i)}$  whose expressive power is bounded by  $j$ -FWL, and thus is be described by  $\text{FOC}_{j+1}$ .

Now we need to prove the equivalence between  $\text{FOC}_{j+1}$  on the augment graphs  $G_{(\mathbf{u},i)}$  and  $\text{FOC}_{k+1,i}$  on the original graph  $G$ . Specially, we want to prove

1. Given any  $\text{FOC}_{j+1}$  formula  $\varphi$  on  $G_{(\mathbf{u},i)}$ , there is a corresponding  $\text{FOC}_{k+1,i}$  formula  $\psi$  on  $G$  that expresses  $\varphi$ .
2. Given any  $\text{FOC}_{k+1,i}$  formula  $\psi$  on  $G$ , there exists  $\mathbf{u}$  such that a  $\text{FOC}_{j+1}$  formula  $\varphi$  on  $G_{(\mathbf{u},i)}$  expresses  $\psi$ .

1. It is simple to create the corresponding  $\psi$ . We only need to replace all unary predicates  $C(v)$  with an invented one  $C'(x_1, x_2, \dots, x_i, v)$ , and replace all binary predicates  $E'(v, w)$  with an invented one  $E'(x_1, x_2, \dots, x_i, v, w)$ . We define

$$C'(x_1, x_2, \dots, x_i, v) := \begin{cases} \mathbf{1}_{x_l=v}, & \text{if } C(v) := \text{IsTarget}_l(v), \\ C(v), & \text{else.} \end{cases}$$

$$E'(x_1, x_2, \dots, x_i, v, w) := E(v, w).$$

Therefore, we effectively remove all emergence of the additional predicates  $\text{IsTarget}_l(\cdot)$ .

2. Suppose the target tuple is fixed  $\mathbf{u}$ . This indicates that all predicates in  $\psi$  share the same first  $i$  variables  $\mathbf{u}_i$ . The same way, we replace predicates in  $\psi$  with our invented ones. Note that a predicate  $P(u_1, \dots, u_k)$  is defined by any permutation-invariant functions over the subgraph induced by  $u_1, \dots, u_k$ . Therefore we initialize  $P'(u_{i+1}, \dots, u_k) = P(u_1, \dots, u_k)$  for all  $P$ . Since all predicates in  $\psi$  share the same first  $i$  variables  $\mathbf{u}_i$ , we can replace all emergence of predicates in  $\psi$  and eliminate the first  $i$  variables in this way. We have constructed the corresponding  $\text{FOC}_{j+1}$  formula  $\varphi$  on  $G_{\mathbf{u}_i}$ .  $\square$

## 226 B.4 Proof of Proposition 8

227 We first restate Proposition 8 here.

228 **Proposition 8** Given a graph  $G = (\mathcal{V}_G, \mathcal{E}_G)$ , we run 1-WL to assign node colors for  $G$ , denoted as  
 229  $\text{Col}(\cdot)$ . The color of a path  $P = (w_1, \dots, w_d)$  is obtained by hashing the corresponding node color  
 230 sequence  $\text{Col}(P) = \text{Hash}(\text{Col}(w_1), \dots, \text{Col}(w_d))$ . Then, the correlation between two nodes  $(u, v)$ ,  
 231 as discussed above, is expressed by all paths between  $u, v$ ,

$$\text{Corr}(u, v) = \text{Hash}(\{\{\text{Col}(P) \mid P \in \text{Paths}(u, v)\}\}).$$

232 Given two connected graphs  $G = (\mathcal{V}_G, \mathcal{E}_G)$  and  $H = (\mathcal{V}_H, \mathcal{E}_H)$ . Let  $\mathbf{u} = (u_1, \dots, u_k) \in \mathcal{V}_G^k$ ,  $\mathbf{v} =$   
 233  $(v_1, \dots, v_k) \in \mathcal{V}_H^k$  be the target node tuples. If there exists  $1 \leq p, q \leq k$  such that  $\text{Corr}(u_p, u_q) \neq$   
 234  $\text{Corr}(v_p, v_q)$ , then any  $i$ - $j$ -NL<sub>MP</sub> with  $i + j \geq k$  with sufficient injective layers always distinguishes  
 235  $\mathbf{u}$  and  $\mathbf{v}$ .

236 *Proof.* Since the weakest  $i$ - $j$ -NL<sub>MP</sub> variant given fixed  $k = i + j$  is the  $(k - 1)$ -1-NL<sub>MP</sub>, we only  
 237 prove the result for  $(k - 1)$ -1-NL<sub>MP</sub>.

238 Suppose  $\text{Corr}(u_p, u_q) \neq \text{Corr}(v_p, v_q)$ . Without loss of generality we may assume that  $u_p, v_p$  are  
 239 with node labeling. By the definition of Corr we know that there are at least one type of color of  
 240 paths  $C = \text{Hash}(C_1, \dots, C_d)$  such that the number of  $C$ -colored paths between  $(u_p, u_q)$  are different  
 241 from that between  $(v_p, v_q)$ . We manually construct a  $i$ - $j$ -NL<sub>MP</sub> model that distinguishes  $u_q, v_q$  from  
 242  $G_{(\mathbf{u})}, H_{(\mathbf{v})}$ . First, we add sufficient injective layers to the model, but these layers are not aware of the  
 243 additional node labels. In other words, we compute the 1-WL color Col in this way. Then, we let the  
 244 next layers to detect the paths as

$$\text{Layer}^{(1)}(x) = (\text{Col}(x), \mathbf{1}(x \text{ is the } p\text{-th node labeling}) \cdot \mathbf{1}(\text{Col}(x) = C_1)),$$

245 where  $\mathbf{1}$  is the indicator function. Similarly, we define the  $l$  layer for  $l \leq d$  as

$$\begin{aligned} \text{ColLayer}^{(l)}(x) &= \text{Layer}^{(l-1)}(x)[0] = \text{Col}(x), \\ \text{PathLayer}^{(l)}(x) &= \text{Layer}^{(l-1)}(x)[1], \\ \text{Layer}^{(l)}(x) &= \left( \text{ColLayer}^{(l)}(x), \mathbf{1}(\text{ColLayer}^{(l)}(x) = C_l) \cdot \sum_{y \in \mathcal{N}(x)} (\text{PathLayer}^{(l)}(y)) \right). \end{aligned}$$

246 Therefore,  $\text{Layer}^{(d)}(x)$  counts the number of  $C$ -colored paths between  $x$  and  $u_p$  or  $v_p$ . Thus  
 247  $\text{Layer}^{(d)}(u_q) \neq \text{Layer}^{(d)}(v_q)$ . If  $q = k$ , then this directly indicates that our  $(k - 1)$ -1-NL<sub>MP</sub>  
 248 distinguishes them. If  $q < k$ , then we further add sufficient identical layers as follows.

$$\text{IdLayer}^{(0)}(x) = \mathbf{1}(x \text{ is the } q\text{-th node labeling}) \odot \text{Layer}^{(d)}(x)[1],$$

249 and

$$\text{IdLayer}^{(l)}(x) = \max_{y \in \mathcal{V}(x)} \text{IdLayer}^{(l-1)}(y).$$

250 After sufficient layers, IdLayer gives different results on  $u_k$  and  $v_k$ . □

## 251 B.5 Proof of Theorem B.3

252 *Proof.* Let  $G, H$  be a pair of connected graphs and let  $\mathbf{u}, \mathbf{v}$  be the target  $k$ -tuples. Let  $G_{(\mathbf{u})}, H_{(\mathbf{v})}$  be  
 253 the corresponding node labeling induced graphs. Since  $G, H$  are connected, we need to show the  
 254 following statements are equivalent.

- 255 1. 1-WL cannot distinguish  $G_{(\mathbf{u})}, H_{(\mathbf{v})}$
- 256 2. 2-WL cannot distinguish  $G_{(\mathbf{u})}, H_{(\mathbf{v})}$
- 257 3. No FOC<sub>2</sub> formula distinguishes  $G_{(\mathbf{u})}, H_{(\mathbf{v})}$
- 258 4. Player II has a winning strategy for the  $(k + 2)$ - $k$  pebble game on  $G, H$  which initially  
 259 places the  $k$  pairs of static pebbles on  $\mathbf{u}, \mathbf{v}$ .



260  $1 \iff 2 \iff 3$ :  $2 \iff 3$  is proved as a special case in Cai et al. [1]. Since  $G, H$  are connected,  
 261  $1 \iff 2$  also holds.

262  $2 \Rightarrow 4$ : Suppose after  $r$  iterations the 2-WL still assigns the same color to  $G_{(\mathbf{u})}, H_{(\mathbf{v})}$ . We instead  
 263 prove the following statement:

- 264 • After  $r + k$  iterations 2-WL gives  $(x_1, y_1) \in \mathcal{V}_{G_{(\mathbf{u})}}^2$  and  $(x_2, y_2) \in \mathcal{V}_{H_{(\mathbf{v})}}^2$  the same color  
 265  $\implies$  Player **II** has a winning strategy for the  $(k + 2)$ - $k$  pebble game on  $G, H$  which initially  
 266 places the  $k$  pairs of static pebbles on  $\mathbf{u}, \mathbf{v}$  and place the other 2 pairs of static pebbles on  
 267  $(x_1, y_1)$  and  $(x_2, y_2)$  in  $r$  moves.

268 We assume  $W^r$  to be the color assignment of 2-WL at iteration  $r + k$ . Clearly player **I** can only  
 269 chooses one of the pebbles on  $x_1, y_1$ . Without loss of generality suppose he picks up  $x_1$ . The player  
 270 **II** answers with the bijective mapping that maps node pairs with the same  $W^{r-1}$  color, that is,  
 271  $f(t_1) \in \{t_2 \mid W^{r-1}(t_1, y_1) = W^{r-1}(t_2, y_2)\}$ . Note that such mapping must exist because

$$W^r(x, y) = \text{Hash}(W^{r-1}(x, y), \{\{W^{r-1}(x, z) \mid z \in \mathcal{V}_G\}\}, \{\{W^{r-1}(z, y) \mid z \in \mathcal{V}_G\}\})$$

272 is the same for  $(x_1, y_1)$  and  $(x_2, y_2)$ . No matter which node player **I** places his pebble on, player **II**  
 273 places her pebble on the corresponding node. Player **II** has not yet lost: the structure between  $(t_1, y_1)$   
 274 and  $(t_2, y_2)$  must be the same, otherwise they have different  $W^{r-1}$  colors. The structure between  
 275  $(t_1, \mathbf{u})$  and  $(t_2, \mathbf{v})$  are also the same: This is because that at the start we added unique labels to the  
 276  $k$ -tuples  $\mathbf{u}$  and  $\mathbf{v}$ . Therefore, after the first  $k$  rounds of 2-WL iterations if the subgraphs induced by  
 277  $t_1, y_1, \mathbf{u}$  from  $G_{(\mathbf{u})}$  and  $t_2, y_2, \mathbf{v}$  from  $H_{(\mathbf{v})}$  are different,  $(t_1, y_1)$  and  $(t_2, y_2)$  will also have different  
 278 2-WL colors. Now, since  $(t_1, y_1)$  and  $(t_2, y_2)$  have the same  $W^{r-1}$  colors, by induction on  $r$  we  
 279 proved the above statement.

280 By further induction on  $r$  in the statement, we can prove  $2 \Rightarrow 4$  because we have showed that for any  
 281 node pairs the results of 2-WL and the pebble game are always consistent.

282  $\neg 3 \Rightarrow \neg 4$ : Suppose for some  $\text{FOC}_2$  formula  $\varphi$ ,  $G_{(\mathbf{u})} \models \varphi$  and  $H_{(\mathbf{v})} \not\models \varphi$ . If  $\varphi$  is a conjunction  
 283 then  $G_{(\mathbf{u})}, H_{(\mathbf{v})}$  must differs on at least one of the conjuncts, so we may assume  $\varphi$  is of the form  
 284  $\exists^N x \psi$ . Without loss of generality we assume the quantifier depth of  $\varphi$  is  $r$ . Note that there are total 2  
 285 free pairs of pebbles that can be placed to nodes, which exactly corresponds to the number of free  
 286 variables in  $\text{FOC}_2$  formula. Player **I** takes a pebble, corresponding to the variable  $x$  in  $\varphi$ . Player  
 287 **II** must respond with a bijective mapping  $f$ . Since  $G_{(\mathbf{u})} \models \varphi$  and  $H_{(\mathbf{v})} \not\models \varphi$ , we know that there  
 288 are at least  $N$  nodes satisfying  $\psi$  in  $G_{(\mathbf{u})}$  but less than  $N$  nodes satisfying  $\psi$  in  $H_{(\mathbf{v})}$ . Player **I** then  
 289 picks the node  $w$  in  $G_{(\mathbf{u})}$  such that  $\psi(w)$  is true but  $\psi(f(w))$  is false. By induction we can see that at  
 290 quantifier depth 0 player **II** loses the game.  $\square$

## 291 C The algorithm complexities of $i$ - $j$ -NL<sub>MP</sub>

292 In this section we derive the algorithm complexities of  $i$ - $j$ -NL<sub>MP</sub>.

### 293 C.1 The case of $j \geq 2$

294 We first study the situation where we assume  $j \geq 2$ . Suppose we are given a graph  $G = (\mathcal{V}, \mathcal{E})$  with  
 295  $N$  nodes and  $M$  edges. Our model is a  $i$ - $j$ -NL<sub>MP</sub>, and we let  $k = i + j$ . Suppose we want to evaluate  
 296 every  $k$ -tuple  $\mathbf{u} \in \mathcal{V}^k$ .

297 Obviously there are total  $N^k$  target tuples in the graph. For learning one tuple  $\mathbf{u} \in \mathcal{V}^k$ , we need to  
 298 first assign node labeling to  $\mathbf{u}_{:i}$ , then apply a  $j$ -MPNN on  $G_{(\mathbf{u}_{:i})}$ . The numbers of nodes and edges in  
 299  $G_{(\mathbf{u}_{:i})}$  are still  $N, M$  respectively. Since we assume the  $j$ -MPNN simulate the  $j$ -FWL, applying the  
 300  $j$ -MPNN on  $G_{(\mathbf{u}_{:i})}$  and simultaneously learning representations all  $j$ -tuples requires  $\mathcal{O}(N^j)$  space  
 301 and  $\mathcal{O}(N^{j+1})$  time. After this procedure, we actually learns all  $k$ -tuples with the same first  $i$  nodes  
 302  $\mathbf{u}_{:i}$ , so we only need to apply this procedure for  $N^i$  times to learn all representations for all  $k$ -tuples.  
 303 Therefore, we need  $\mathcal{O}(N^j)$  space and  $\mathcal{O}(N^{i+j+1})$  time.

## 304 C.2 The case of $j = 1$

305 When  $j = 1$  the time and space complexities of MPNN are  $\mathcal{O}(M)$  and  $\mathcal{O}(N)$  respectively. Therefore,  
 306 the total process for computing all  $k$ -tuple takes  $\mathcal{O}(N)$  space and  $\mathcal{O}(MN^{i+j-1})$  time. As a result,  
 307 the conclusion in Section 4.1 still holds.

## 308 D The Weisfeiler-Lehman Algorithms

309 In this section we briefly introduce the  $k$ -FWL graph isomorphism tests.

### 310 D.1 1-WL

311 The 1-WL test is also known as color refinement and shares similar message passing process with  
 312 node-level GNNs. To begin with, each node  $v$  is assigned with a color  $c_v$ . The 1-WL test can then be  
 313 summarized as follows:

---

#### Algorithm 1 1-WL test

---

**Input:**  $\mathcal{G} = (\mathcal{V}, \mathcal{E})$ : the input graph;  $c_v$  for  $v \in \mathcal{V}$ : initial colors;

**Output:** the final colors;

- 1:  $c_v^0 \leftarrow c_v$  for all  $v \in \mathcal{V}$ ;
  - 2: **repeat**
  - 3:    $\forall v \in \mathcal{V}, c_v^{l+1} \leftarrow \text{hash}(c_v^l, \{\{c_w^l \mid w \in N(v)\}\})$ ;
  - 4: **until**  $\forall v \in \mathcal{V}, c_v^{l+1} = c_v^l$ ;
  - 5: **return**  $c_v^l$  for every  $v \in \mathcal{V}$ ;
- 

314 Here,  $N(v)$  is the set of the neighbors of  $v$  in  $\mathcal{G}$ . The critical part is the hash function hash. It needs  
 315 to be injective in order to fully express the discriminative power of the 1-WL test.

### 316 D.2 $k$ -FWL

317 The  $k$ -FWL test is summarized as follows.

---

#### Algorithm 2 $k$ -FWL test

---

**Input:**  $\mathcal{G} = (\mathcal{V}, \mathcal{E})$ : the input graph;  $c_u$  for  $u \in \mathcal{V}^k$ : initial colors;

**Output:** the final colors;

- 1:  $c_u^0 \leftarrow c_u$  for all  $u \in \mathcal{V}^k$ ;
  - 2: **repeat**
  - 3:    $\forall u \in \mathcal{V}^k, c_u^{l+1} \leftarrow \text{hash}(c_u^l, \{\{c_v^l \mid v \in N(u)\}\})$ ;
  - 4: **until**  $\forall u \in \mathcal{V}^k, c_u^{l+1} = c_u^l$ ;
  - 5: **return**  $c_u^l$  for every  $u \in \mathcal{V}^k$ ;
- 

318 The difference between the  $k$ -FWL test and the 1-WL is that we now assign a color for each node  
 319 tuple  $u$  instead of a single node. Generally, the  $k$ -FWL test follows the same computation procedure  
 320 with the 1-WL, but we need to redefine the neighbors, i.e.  $N(u)$ , of a node tuple  $u$ . In the  $k$ -FWL  
 321 test, we set each node pair  $u$  to have  $|\mathcal{V}|$  neighbors, with the  $i$ -th neighbor being

$$((i, u_2, \dots, u_k), (u_1, i, u_3, \dots, u_k), \dots, (u_1, \dots, u_{k-1}, i)).$$

## 322 E Different node labeling methods

323 In this section we discuss about different node labeling methods. Generally, the methods we discuss  
 324 here all follows the constraints in Section 2:

- 325 1.  $L(u \mid \mathbf{v}, G) = L(\pi(u) \mid \mathbf{w}, H)$  holds for all  $u \in \mathcal{V}_G \Rightarrow \pi(\mathbf{v}) = \mathbf{w}$ ,
- 326 2.  $\pi$  is an isomorphism from  $(\mathbf{v}, G)$  to  $(\mathbf{w}, H) \Rightarrow \forall u \in \mathcal{V}_G, L(u \mid \mathbf{v}, G) = L(\pi(u) \mid \mathbf{w}, H)$ .

## 327 E.1 0-1 node labeling

328 We first introduce the basic 0-1 node labeling method introduced in SEAL. We modify the original  
329 0-1 node labeling for node tuples here.

330 Given a graph  $G = (\mathcal{V}, \mathcal{E})$  and suppose  $\mathbf{u} = (u_1, \dots, u_k) \in \mathcal{V}^k$  be the target tuple. We define the  
331 node labeling mechanism  $L$  to be

$$L(v \mid \mathbf{u}, G) = \text{Hash}(\mathbf{1}_{v=u_1}, \mathbf{1}_{v=u_2}, \dots, \mathbf{1}_{v=u_k}),$$

332 where  $\mathbf{1}$  is the indicator function. For example in the graph  $G$  in Figure 1, we can assign labels  
333  $1, 2, \dots, k$  to the nodes  $u_1, u_2, \dots, u_k$  respectively and assign label 0 to the rest of the nodes.

334 Now we show that the above 0-1 node labeling satisfies the constraints. Given  $G = (\mathcal{V}_G, \mathcal{E}_G)$ ,  $H =$   
335  $(\mathcal{V}_H, \mathcal{E}_H)$  and  $\mathbf{v} \in \mathcal{V}_G^k$ ,  $\mathbf{w} \in \mathcal{V}_H^k$ ,

336 1. We have

$$\begin{aligned} L(u \mid \mathbf{v}, G) &= L(\pi(u) \mid \mathbf{w}, H) \text{ holds for all } u \in \mathcal{V}_G \\ \implies L(\pi(v_i) \mid \mathbf{w}, H) &= L(\pi(w_i) \mid \mathbf{w}, H) \text{ holds for all } i \in [k] \\ \implies \pi(\mathbf{v}) &= \mathbf{w}. \end{aligned}$$

337 2. Suppose  $\pi$  is an isomorphism and  $\pi(\mathbf{v}) = \mathbf{w}$ , then for any  $u \in \mathcal{V}_G$ , if  $u$  is not in  $\mathbf{v}$ ,  
338 obviously  $\pi(u)$  is also not in  $\mathbf{w}$  (because  $\pi(\mathbf{v}) = \mathbf{w}$ ). Therefore, both  $u$  and  $\pi(u)$  are  
339 assigned with label 0. If  $u$  is in  $\mathbf{v}$ , without loss of generality we suppose  $u = v_i$ . Then  
340  $\pi(\mathbf{v}) = \mathbf{w} \Rightarrow \pi(v_i) = w_i$ . Note that  $L(v_i \mid \mathbf{v}, G) = L(w_i \mid \mathbf{w}, G)$  for any  $i \in [k]$ , therefore  
341  $\forall u \in \mathcal{V}_G, L(u \mid \mathbf{v}, G) = L(\pi(u) \mid \mathbf{w}, H)$ .

## 342 E.2 0-1 induced node labeling

343 There are also some node labeling method that can be induced by the 0-1 node labeling with message  
344 passing. In this section we take Distance Encoding (DE) [4] and Double Radius Node Labeling  
345 (DRNL) [7] as examples and show how they are induced by 0-1 node labeling with message passing.

346 **A generalized version** We introduce a  $k$ -tuple version of DRNL and DE. It's labeling function is

$$L(v \mid \mathbf{u}, G) = \text{Hash}(d(v, u_1), d(v, u_2), \dots, d(v, u_k)),$$

347 where  $d(x, y)$  is the shortest distance between  $x$  and  $y$ . Clearly, DRNL can be computed by MPNNs  
348 with 0-1 node labeling. We only need to set  $\mathbf{h}_v^{(0)} = [\text{Ind}(v, u_1), \dots, \text{Ind}(v, u_k)]$  where  $\text{Ind}(v, u_i) = 0$   
349 if  $v = u_i$  and  $\infty$  otherwise. Therefore it is a valid 0-1 node labeling. We let

$$\mathbf{h}_v^{(l+1)} = \min \left( \mathbf{h}_v^{(l)}, \min \left\{ \mathbf{h}_u^{(l)} + \mathbf{1} \mid u \in \mathcal{N}(v) \right\} \right),$$

350 where  $\min$  is element-wise. This corresponds to the multi-source shortest path and directly corre-  
351 sponds to the above labeling function  $L$ .

## 352 F Additional experiments

### 353 F.1 Verifying the expressive power of $i$ - $j$ -NL<sub>MP</sub>

354 We consider popular variants including 1-1-NL<sub>MP</sub>, 2-1-NL<sub>MP</sub> and 0-2-NL<sub>MP</sub>. To eliminate unrelated  
355 factors we assume these models have sufficient injective layers. We test whether they are able to  
356 distinguish:

- 357 • Cut edges
- 358 • Cut vertices.
- 359 • Rook's  $4 \times 4$  graph and Shrikhande graph

360 These tasks are with increasing difficulties. The problem of detecting cut vertices is shown to be  
361 more complex than detecting cut edges [6]. Note that the problem of detecting cut edges in this  
362 paper is more difficult than [6]: they assume that target nodes must be adjacent while we do not.  
363 Distinguishing Rook's  $4 \times 4$  graph and Shrikhande graph is even more complex: it cannot be done by  
364 the 2-FWL test. Table 1 lists the results. We can see that the results are consistent with our theoretical  
365 findings.

| Graph type            | MPNN | 1-1-NL <sub>MP</sub> | 0-2-NL <sub>MP</sub> | 2-1-NL <sub>MP</sub> |
|-----------------------|------|----------------------|----------------------|----------------------|
| Cut edges             | ×    | ✓                    | ✓                    | ✓                    |
| Cut vertices          | ×    | ×                    | ✓                    | ✓                    |
| Rook's vs. Shrikhande | ×    | ×                    | ×                    | ✓                    |

Table 1: Results of detecting different graph patterns.

## F.2 Experiment configurations

The experiment configurations follow the settings in Chamberlain et al. [2]. Results are taken from [2]. For all tasks we use negative sampling to generate negative targets. At training time the message passing links are equal to the supervision links, while at test time disjoint sets of links are held out that are never seen at training time. We random generate 70-10-20 percent train-val-test splits which is the same as [2]. The number of the max hops of the paths is 5. We search for hyperparameters using the valid dataset and set learning rate to be 0.0001, dropout 0.5, feature propagation layer 2, weight decay 0. The code is implemented in PyTorch [5] and based on the implementation of Chamberlain et al. [2]. The experiments were either run on V100 or CPU. The predictor of the model is designed as  $p(u, v) = \text{MLP}(\mathbf{h}_u \odot \mathbf{h}_v \odot \mathbf{h}_{uv})$  where  $\mathbf{h}_u, \mathbf{h}_v$  are node representations of  $u, v$  respectively and  $\mathbf{h}_{uv}$  is the representations of the paths between  $u, v$ .

## G The problems related to higher-order representations

The problems of learning higher-order representations with GNNs have been extensively studied. However, in fact these methods should be divided into two parts: *learning higher-order representations for predicting node-tuple properties* and *designing higher-order GNNs for learning graph representations*. Although they both learn higher-order representations, they actually study different problems which requires different techniques and solutions.

The goal of the first approaches is to overcome GNNs' inherent weakness on predicting node tuples. This includes the well-known automorphism problem, such as Figure 1.  $u_1, u_k, v_1, v_k$  always share the same node representation, so it is impossible to distinguish between them using a vanilla GNN. Therefore, we need to design more powerful GNN variants to give GNNs new abilities to consider the correlation between  $u_1, u_k$  and  $v_1, v_k$ .

The goal of the second approaches is to improve GNNs' expressive power on graph classification and node classification. Therefore, learning higher-order representations is nothing but a method for strengthening GNNs. In other words, if there are better methods for learning node-level or graph-level representations, higher-order GNNs are not required for this goal.

The difference between the two goals is that, suppose we have a powerful GNN that is able to distinguishes any non-isomorphic nodes (or graphs). Then, the second goal is accomplished: we already reached the upper bound of the expressive power. However, the first goal is far from being accomplished: the automorphism problem still remains. As a result, although higher-order GNNs play an important role in both two problems, the ultimate target and solutions are much different.

## References

- [1] J.-Y. Cai, M. Fürer, and N. Immerman. An optimal lower bound on the number of variables for graph identification. *Combinatorica*, 12:389–410, 1989.
- [2] B. P. Chamberlain, S. Shirobokov, E. Rossi, F. Frasca, T. Markovich, N. Y. Hammerla, M. Bronstein, and M. Hansmire. Graph neural networks for link prediction with subgraph sketching. In *ICLR*, 2023.
- [3] M. Grohe and M. Otto. Pebble games and linear equations. *The Journal of Symbolic Logic*, 80: 797 – 844, 2012.
- [4] P. Li, Y. Wang, H. Wang, and J. Leskovec. Distance encoding: Design provably more powerful neural networks for graph representation learning. In *NeurIPS*, 2020.
- [5] A. Paszke, S. Gross, F. Massa, A. Lerer, J. Bradbury, G. Chanan, T. Killeen, Z. Lin, N. Gimelshein, L. Antiga, A. Desmaison, A. Köpf, E. Yang, Z. DeVito, M. Raison, A. Tejani, S. Chilamkurthy, B. Steiner, L. Fang, J. Bai, and S. Chintala. Pytorch: An imperative style, high-performance deep learning library. *ArXiv*, abs/1912.01703, 2019.
- [6] B. Zhang, S. Luo, L. Wang, and D. He. Rethinking the expressive power of gnns via graph biconnectivity. *ArXiv*, abs/2301.09505, 2023.
- [7] M. Zhang and Y. Chen. Link prediction based on graph neural networks. In *NeurIPS*, 2018.
